# Supplementary material for: Fabrication and Properties of Electrospun Collagen Tubular Scaffold Crosslinked by Physical and Chemical Treatments
Source: MDPI journal article supplement (doi:10.3390/polym13050755), 2021-02-28
Supplement: s1 [file s1]

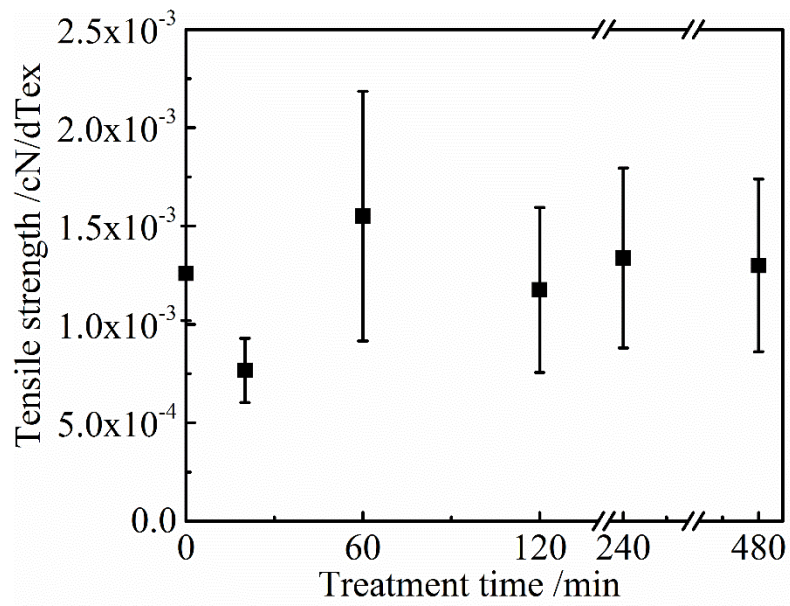

**Fig. S1** Tensile strength of collagen tubes with ammonia treatment for various periods of time in a wet state.

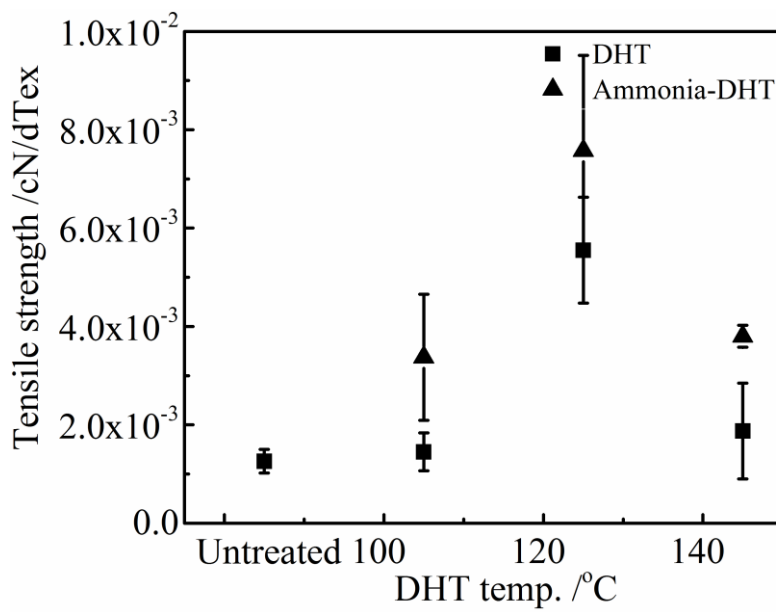

**Fig. S2** Tensile strength of collagen tubes with DHT or ammonia-DHT treatment at various temperature for 3 days in a wet state.

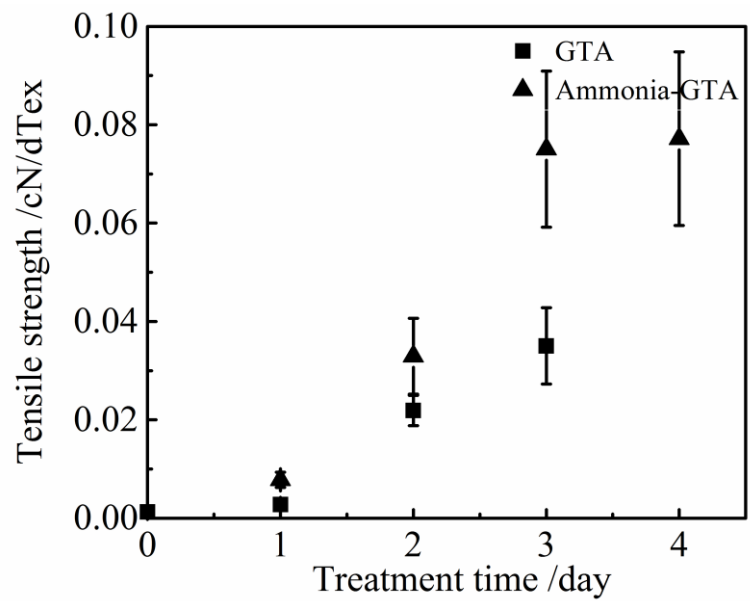

**Fig. S3** Tensile strength of collagen tubes with GTA or ammonia-GTA treatment for various periods of time in a wet state.
